# Supplementary material for: Synergistic effect of polyaniline on stabilizing Pt nanoparticles in PEMFCs
Source: Royal Society of Chemistry journal article supplement (doi:10.1039/d2ta08135k), 2023-01-01
Supplement: d2ta08135k1.pdf [file d2ta08135k1.pdf]

# Synergistic Effect of Polyaniline on Stabilizing Pt Nanoparticles in PEM Fuel Cells

Chenzhao Li<sup>1,2</sup>, Limin Zhu<sup>1,3,\*</sup>, Liang Song<sup>4</sup>, Guangqi Zhu<sup>1</sup>, Qi Zhang<sup>1</sup>, Yuyue Zhao<sup>1,6</sup>, Qing Gong<sup>1</sup>, Chengjun Sun<sup>5</sup>, Yuzi Liu<sup>6</sup>, Kotaro Sasaki<sup>4</sup>, and Jian Xie<sup>1,\*</sup>

<sup>1</sup> Department of Mechanical and Energy Engineering, Purdue School of Engineering and Technology, Indiana University-Purdue University Indianapolis, Indianapolis, Indiana 46202, USA

<sup>2</sup> School of Mechanical Engineering, Purdue University, West Lafayette, Indiana 47906, USA

<sup>3</sup> School of Chemistry and Chemical Engineering, Henan University of Technology, Zhengzhou 450001, China

<sup>4</sup> Chemistry Division, Brookhaven National Laboratory, Upton, New York 11973, USA

<sup>5</sup> Advanced Photon Source, Argonne National Laboratory, 9700 South Cass Avenue, Argonne, Illinois 60439, USA

<sup>6</sup> Center for Nanoscale Materials, Argonne National Laboratory, 9700 South Cass Avenue, Argonne, Illinois 60439, USA

\* Corresponding authors: Jian Xie, [jianxie@iupui.edu](mailto:jianxie@iupui.edu)

Limin Zhu, [lmzhu@haut.edu.cn](mailto:lmzhu@haut.edu.cn)

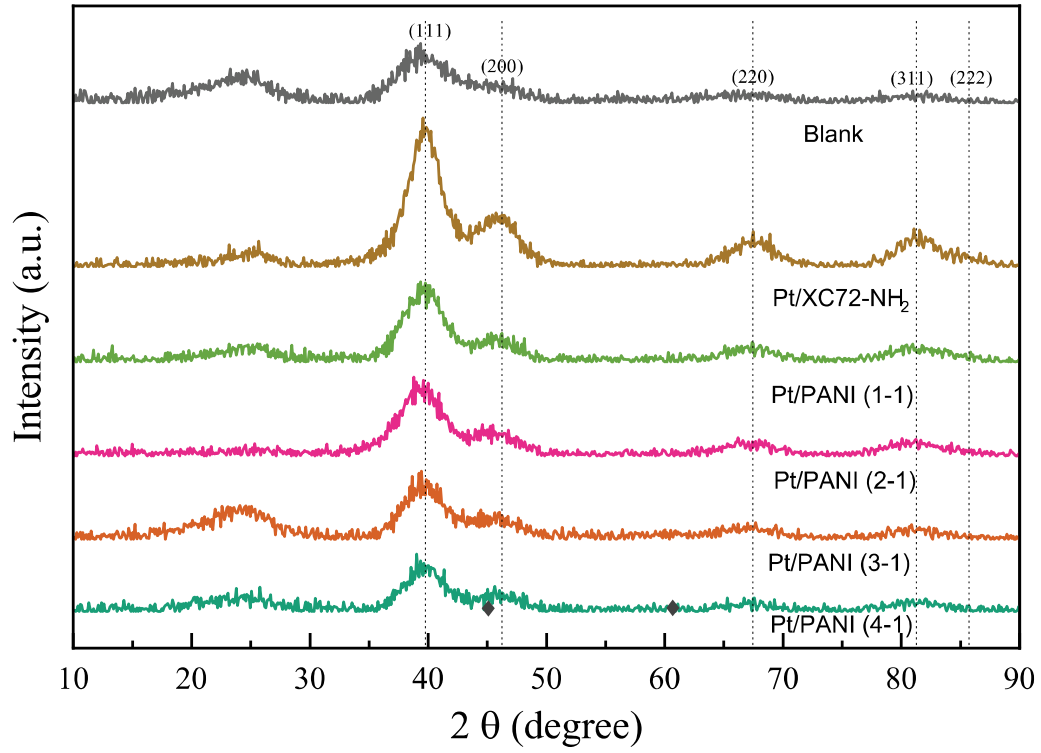

Figure S1. X-Ray diffraction (XRD) results of blank, Pt/XC72-NH<sub>2</sub>, 1-1, 2-1, 3-1, and 4-1 catalyst.

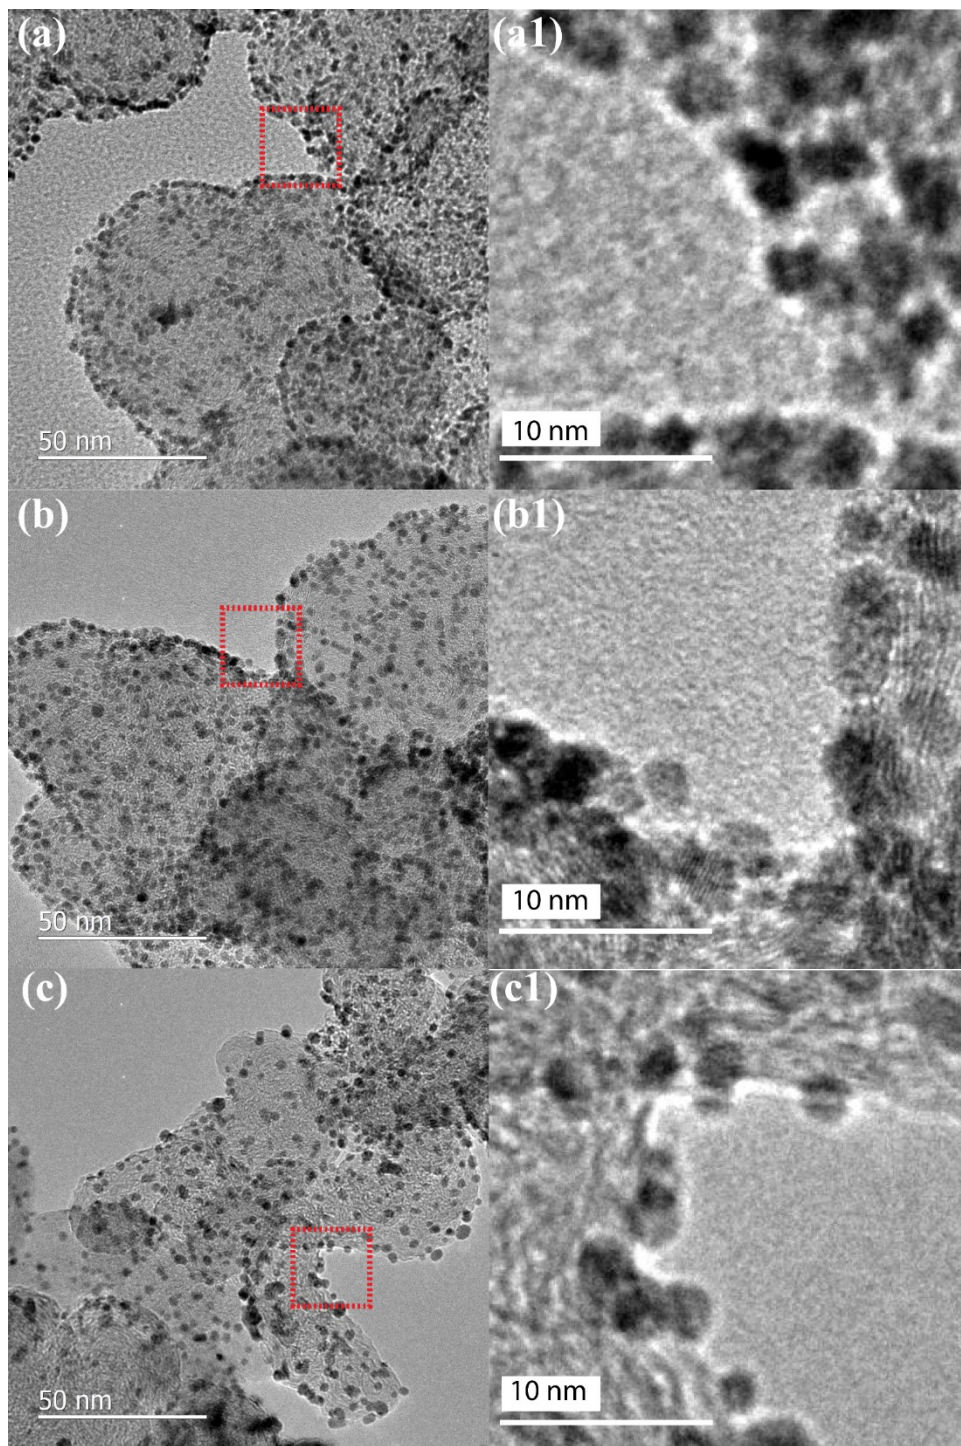

Figure S2. Transmission electron spectroscopy (TEM) image of (a) 3-1 sample, (a1) zoom in of rectangular with red dash line of (a), (b) 4-1 sample, (b1) zoom in of rectangular with red dash line of (b), and (c) 4-1 sample, (c1) zoom in of rectangular with red dash line of (c).

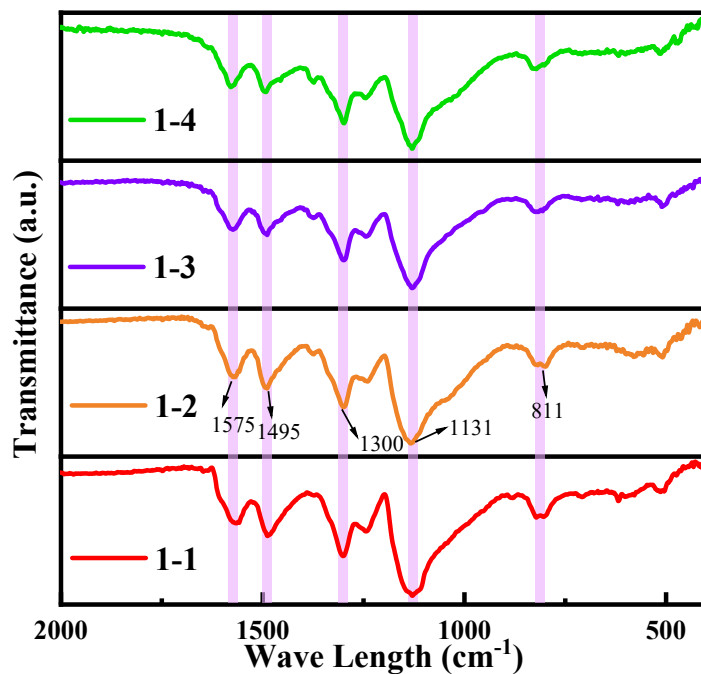

Figure S3. Fourier transform infrared (FT-IR) spectrum results of polyaniline grafted carbon.

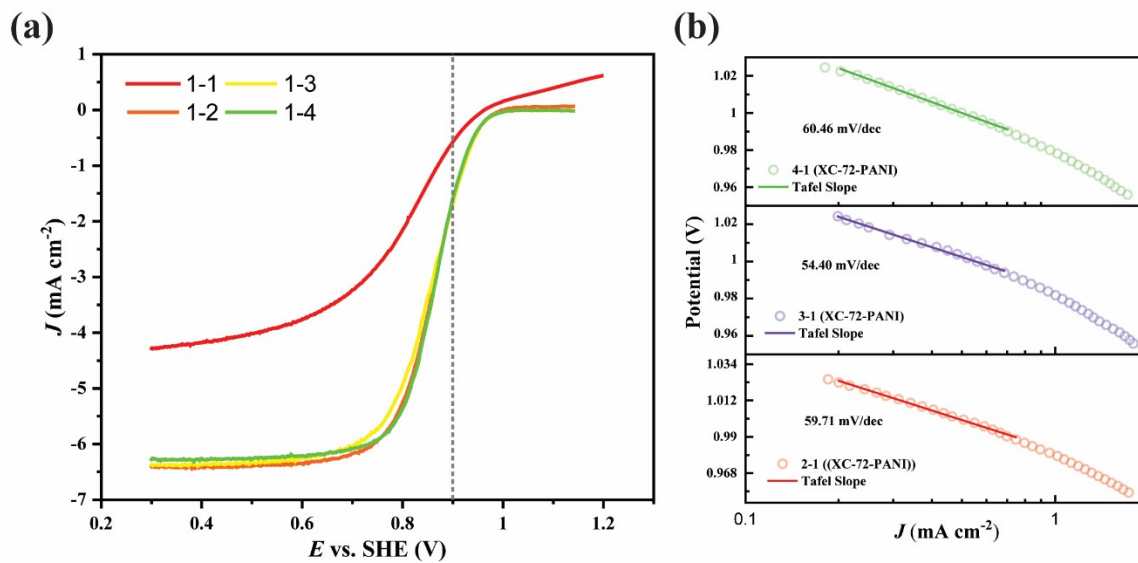

Figure S4. (a) ORR polarization curves of 1-1, 2-1, 3-1, and 4-1 sample, (b) Tafel slope of 2-1, 3-1, 4-1 samples. ORR polarization curve measured on the RDE in a  $O_2$ -saturated 0.1 M  $HClO_4$  solution at a scan rate of 10 mV/s with a rotation speed of 1600 rpm

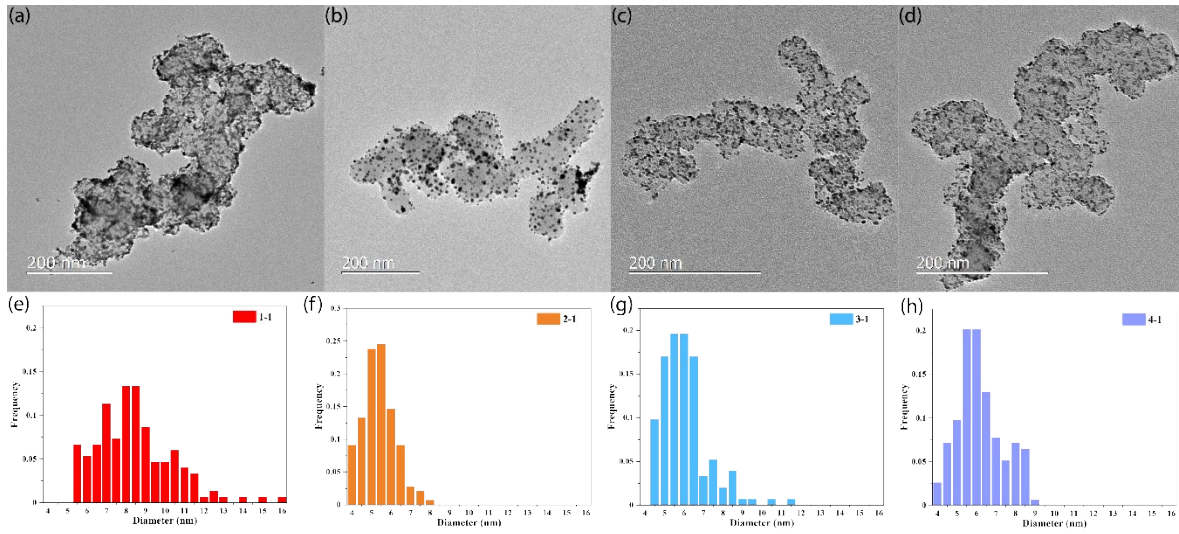

Figure S5. image of (a) 1-1 sample, (b) 2-1 sample, (c) 3-1 sample, (d) 2-1 sample after 30k accelerating stress testing (AST), and their particle size distribution of (e) 1-1, (f) 2-1, (g) 3-1, and (h) 4-1 sample.
